# Supplementary material for: Spherocytosis-Related L1340P Mutation in Ankyrin Affects Its Interactions with Spectrin
Source: MDPI journal article supplement (doi:10.3390/life13010151), 2023-01-04
Supplement: s1 [file s1]

# Spherocytosis-Related L1340P Mutation in Ankyrin Affects Its Interactions with Spectrin

Beata Machnicka, Aleksander Czogalla, Dżamila M. Bogusławska, Piotr Stasiak and Aleksander F. Sikorski

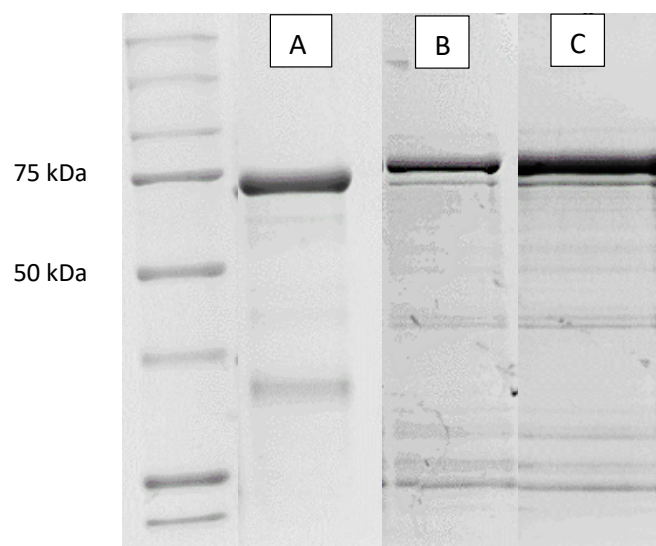

**Figure S1.** Representative SDS-PAGE of purified His(6)GFP-AnkBD (A) and ZZUD-GST (B) and ZZUDL1340P-GST (C). Samples were run in 10% gel and stained with Coomassie Blue. Standard was Precision Plus Unstained Protein Standard (Bio-Rad).

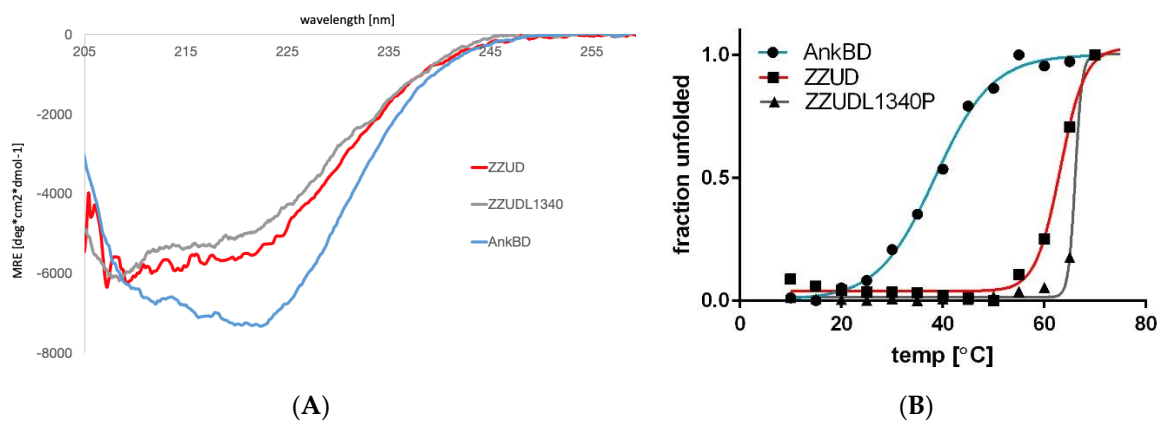

**Figure S2.** Representative circular dichroism spectra (A) measured at 20 °C and melting curves (B) of His(6)GFP-AnkBD (blue), ZZUD-GST (red) and ZZUD L1340-GST (gray).

**ZU5 1**

>sp|P16157|ANK1\_HUMAN|913-1068 OS=Homo sapiens OX=9606 GN=ANK1 PE=1 SV=3  
FLVSFMVDAR GGSMRGRHN GLRVVIPRT CAAPTRITCR LVKPQKLSTP PPLAEEEEGLA  
SRIIALGPTG AQFLSPVIVE IPHFASHGRG DRELVVLRSE NGSVWKEHRS RYGESYLDQI  
LNGMDEELGS LEELEKKRVC RIITDFPLY FVIMSR

**ZU5 2**

>sp|P16157|ANK1\_HUMAN|1070-1216 OS=Homo sapiens OX=9606 GN=ANK1 PE=1 SV=3  
CQDYDTIGPE GGSLKSKLVP LVQATFPENA VTKRVKLALQ AQPVPDELVT KLLGNQATFS  
PIVTVEPRRR KFHRPIGLRI PLPPSWTDNP RDSGEGDTS LRLCSVIGG TDQAQWEDIT  
GTTKLVYANE CANFTTNVSA RFWLSDC

**UPA**

>sp|P16157|ANK1\_HUMAN|1234-1362 OS=Homo sapiens OX=9606 GN=ANK1 PE=1 SV=3  
TAVPYMAKFV IFAKMNDPRE GRLRCYCMTD DKVDKTLEQH ENFVEVARSR DIEVLEGMSL  
FAELSGNLVP VKKAAQQRSF HFQSFRENRL AMPVKVRDSS REPGGSLSL RKAMKYEDTQ  
HILCHLNIT

**Death**

>sp|P16157|ANK1\_HUMAN|1403-1487 OS=Homo sapiens OX=9606 GN=ANK1 PE=1 SV=3  
AEMKMAVISE HLGLSWAELA RELQFSVEDI NRIRVENPNS LLEQSVALLN LWVIREGQNA  
NMENLYTALQ SIDRGEIVNM LEGSG

**Figure S3.** The sequence of ZZUD supramodule according UNIPROT database  
<https://www.uniprot.org/uniprotkb/P16157/entry>.
